# Supplementary material
Source: publisher figshare collection journal article supplement (https://diabetesjournals.figshare.com/articles/dataset/_/13075748)
Supplement: Supplementary file 2 [file 1]

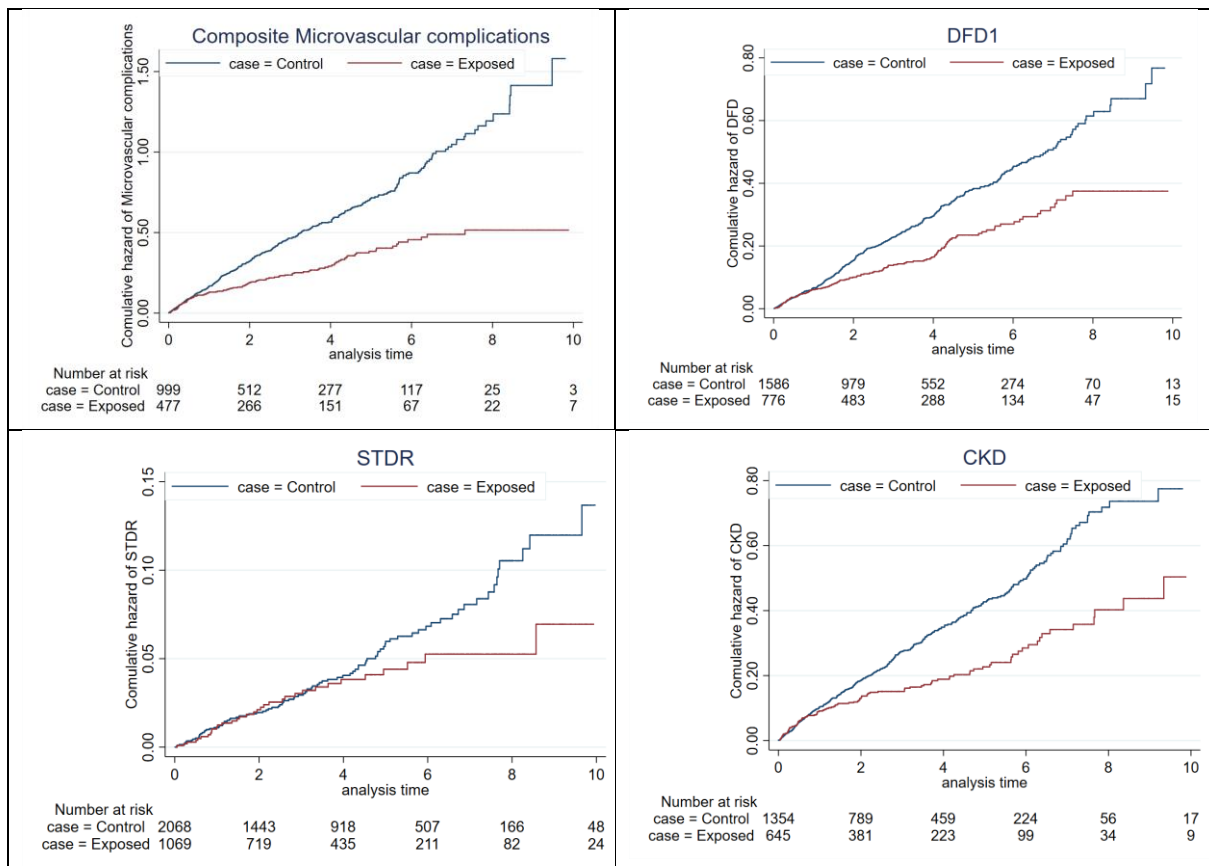

Supplement Figure 2: Unadjusted Nelson-Aalen cumulative hazard estimates for composite microvascular complications, DFD1, STDR and CKD
