# Supplementary material
Source: publisher figshare collection journal article supplement (https://diabetesjournals.figshare.com/articles/dataset/_/13075748)

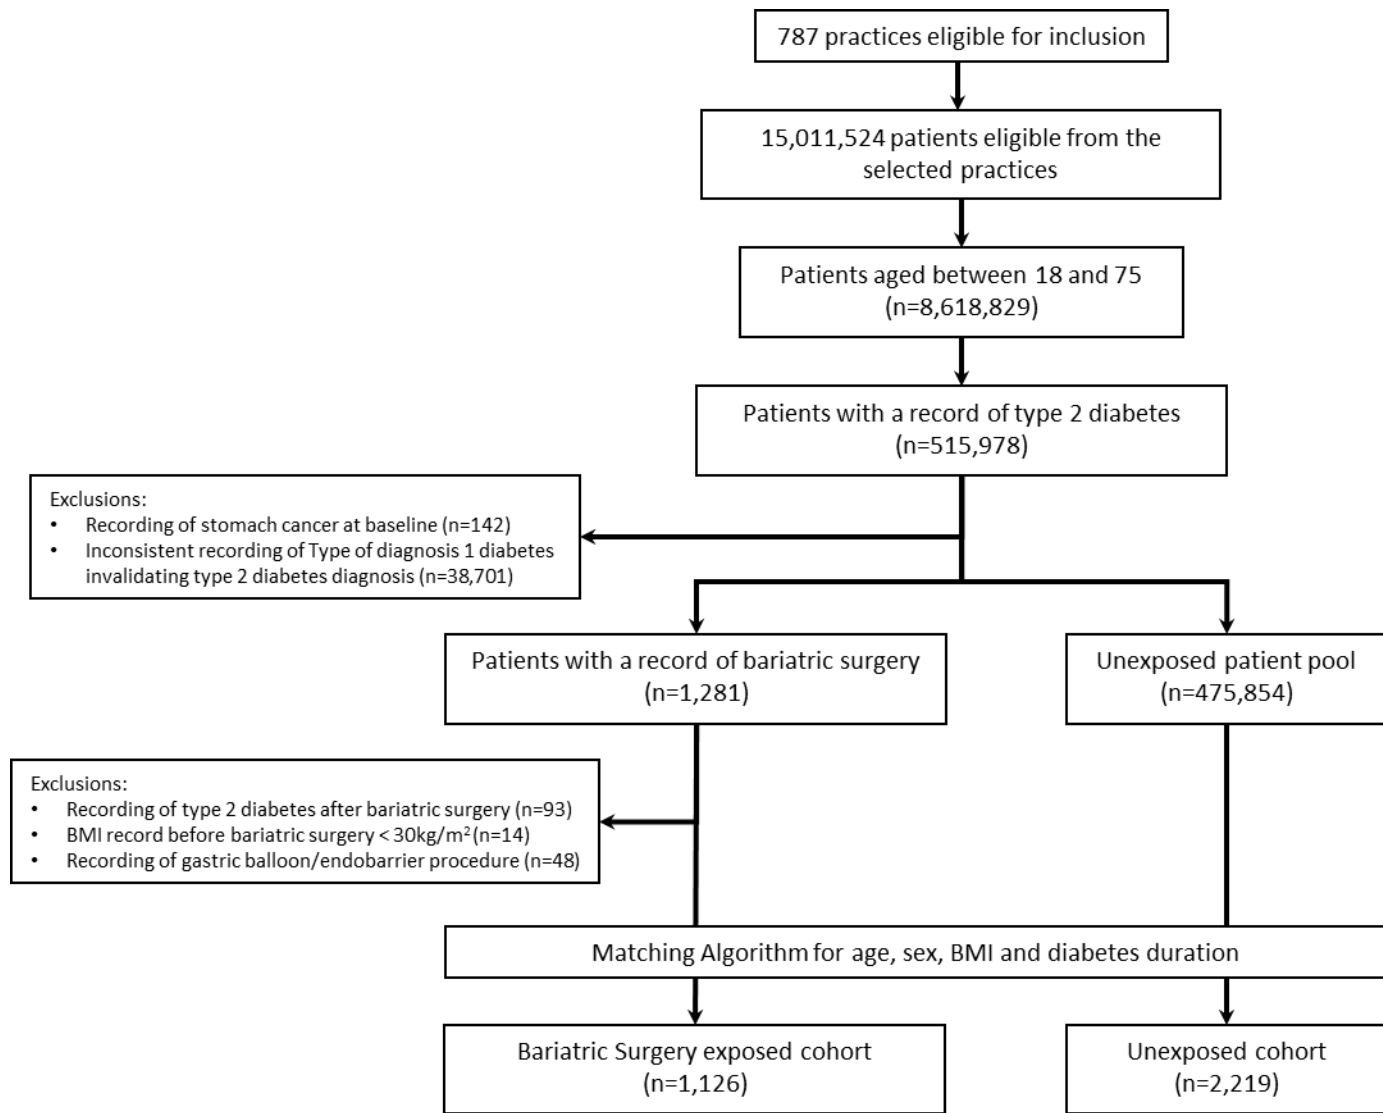

Supplement Figure 1: Flowchart showing participant selection

Supplement: Supplementary file 1 [file 1]
